# Supplementary material for: Correlation between magnetic resonance imaging (MRI) features and lesion size in focal nodular hyperplasia of the liver
Source: PubMed Central journal article supplement — Quant Imaging Med Surg. 2024 Nov 13;14(12):8758–70. doi: 10.21037/qims-24-836 (PMC11652048; doi:10.21037/qims-24-836), 2024-11-13
Supplement: qims-14-12-8758-supplementary.pdf [file qims-14-12-8758-supplementary.pdf]

## Appendix 1 Gd-EOB-DTPA-enhanced MR protocol and analysis

The Gd-EOB-DTPA-enhanced MR images were obtained in a 3.0-T scanner. After an intravenous injection of 0.025 mmol/kg of gadoteric acid at a rate of 2 mL/s, we obtained images of arterial phase, portal venous phase, delayed phase and hepatobiliary phase (HBP) in 20–40s, 60–80s, 90–120s and 20min after contrast agent administration, respectively. The Gd-EOB-DTPA-enhanced MR scan and the conventional MR scan were performed within an interval of two weeks.

Enhancement on HBP images was assessed independently by an experienced abdominal radiologist (P.X. with 28 years of experience), and it was categorized into the following four patterns. (I) homogeneously hyperintense: homogeneously hyperintense except the scar; (II) heterogeneous hyperintense; (III) peripheral ring-like with hypointense central core; (IV) absence of enhancement. The guideline from the European Association for the Study of the Liver (EASL) for management of benign hepatocellular lesions were used for diagnostic confirmation of FNH (30).

### References

30. Marrero JA, Ahn J, Rajender Reddy K; American College of Gastroenterology. ACG clinical guideline: the diagnosis and management of focal liver lesions. *Am J Gastroenterol* 2014;109:1328-47; quiz 1348.

**Table S1** Demographic and MR features of FNHs between training and validation set

| Variable                                   | Training cohort (n=254) | Validation cohort (n=109) | P value |
|--------------------------------------------|-------------------------|---------------------------|---------|
| Age (years)                                | 32.0 (27.0–41.3)        | 31.0 (27.0–38.0)          | 0.366   |
| Male sex                                   | 145 (57.1)              | 53 (48.6)                 | 0.138   |
| Size (cm)                                  | 4.2±2.3                 | 4.3±2.4                   | 0.593   |
| Hepatic steatosis                          | 72 (28.3)               | 32 (29.4)                 | 0.845   |
| Intralesional fat                          | 13 (5.1)                | 5 (4.6)                   | 0.831   |
| Morphology                                 |                         |                           | 0.424   |
| Round                                      | 105 (41.3)              | 50 (45.9)                 |         |
| Lobulated                                  | 149 (58.7)              | 59 (54.1)                 |         |
| DWI                                        |                         |                           | 0.634   |
| Isointense                                 | 26 (10.2)               | 13 (11.9)                 |         |
| Hyperintense                               | 228 (89.8)              | 96 (88.1)                 |         |
| ADC ( $\times 10^{-3}$ mm <sup>2</sup> /s) | 1.7±0.4                 | 1.6±0.4                   | 0.324   |
| T1WI                                       |                         |                           | 0.792   |
| Hypointense                                | 129 (50.8)              | 57 (52.3)                 |         |
| Isointense                                 | 125 (49.2)              | 52 (47.7)                 |         |
| T2WI                                       |                         |                           | 0.069   |
| Isointense                                 | 110 (43.3)              | 42 (38.5)                 |         |
| Hyperintense                               | 144 (56.7)              | 67 (61.5)                 |         |
| Homogeneity on T2WI                        |                         |                           | 0.511   |
| Homogenous                                 | 195 (76.8)              | 87 (79.8)                 |         |
| Heterogeneous                              | 59 (23.2)               | 22 (20.2)                 |         |
| Enhancing capsule                          | 73 (28.7)               | 29 (26.6)                 | 0.104   |
| Central scar                               | 174 (68.5)              | 72 (66.1)                 | 0.647   |
| Feeding artery                             | 102 (40.2)              | 37 (33.9)                 | 0.264   |
| Radiating septa                            | 156 (61.4)              | 61 (56.0)                 | 0.331   |
| Enhancement pattern                        |                         |                           | 0.291   |
| Hyper/hyper/hyper                          | 88 (34.6)               | 46 (42.2)                 |         |
| Hyper/hyper-iso/iso                        | 160 (63.0)              | 62 (56.9)                 |         |
| Hyper/hypo/hypo                            | 6 (2.4)                 | 1 (0.9)                   |         |

Data are presented as mean  $\pm$  standard deviation or number (%). MR, magnetic resonance; FNH, focal nodular hyperplasia; DWI, diffusion-weighted imaging; ADC, apparent diffusion coefficient; T1WI, T1-weighted imaging; T2WI, T2-weighted imaging; hyper, hyperintense; iso, isointense; hypo, hypointense.

**Table S2** Interobserver agreement for MR imaging features

| Imaging features                                                            | $\kappa$ value |
|-----------------------------------------------------------------------------|----------------|
| Size ( $\geq 3$ cm/ $< 3$ cm)                                               | 0.905          |
| Hepatic steatosis                                                           | 0.883          |
| Morphology (round/lobulated)                                                | 0.736          |
| Enhancing capsule                                                           | 0.635          |
| DWI (isointense/hyperintense)                                               | 0.834          |
| ADC ( $\times 10^{-3}$ mm <sup>2</sup> /s)                                  | 0.865          |
| T1WI (hypointense/isointense)                                               | 0.838          |
| T2WI (isointense/hyperintense)                                              | 0.766          |
| Homogenous/heterogeneous                                                    | 0.651          |
| Central scar                                                                | 0.802          |
| Feeding artery                                                              | 0.759          |
| Radiating septa                                                             | 0.816          |
| Enhancement pattern (Hyper/hyper/hyper/Hyper/hyper-iso/iso/Hyper/hypo/hypo) | 0.834          |

MR, magnetic resonance; DWI, Diffusion-weighted imaging; ADC, apparent diffusion coefficient; T1WI, T1-weighted imaging; T2WI, T2-weighted imaging; hyper, hyperintense; iso, isointense; hypo, hypointense.

**Table S3** Enhancement pattern on hepatobiliary phase

| Imaging features                                   | $\leq 3$ cm (n=14) | $> 3$ cm (n=18) | P value |
|----------------------------------------------------|--------------------|-----------------|---------|
| Enhancement pattern                                |                    |                 | 0.014   |
| Homogeneous hyperintense                           | 2 (14.3)           | 7 (38.9)        |         |
| Heterogeneous hyperintense                         | 3 (21.4)           | 9 (50.0)        |         |
| Peripheral ring-like with hypointense central core | 7 (50.0)           | 2 (11.1)        |         |
| Absence of enhancement                             | 2 (14.3)           | 0 (0)           |         |

Data are presented as number (%).

**Table S4** Diagnosis of FNH according to Gd-EOB-DTPA-enhanced MRI and scoring system

| Variable                        | Scoring system (+) | Scoring system (-) | P value |
|---------------------------------|--------------------|--------------------|---------|
| Small FNHs                      |                    |                    | 0.070   |
| Gadoxetic acid-enhanced MRI (+) | 4                  | 7                  |         |
| Gadoxetic acid-enhanced MRI (-) | 1                  | 2                  |         |
| Large FNHs                      |                    |                    | 0.500   |
| Gadoxetic acid-enhanced MRI (+) | 15                 | 2                  |         |
| Gadoxetic acid-enhanced MRI (-) | 0                  | 1                  |         |

FNH, focal nodular hyperplasia; Gd-EOB-DTPA, gadoxetic acid; MRI, magnetic resonance imaging.

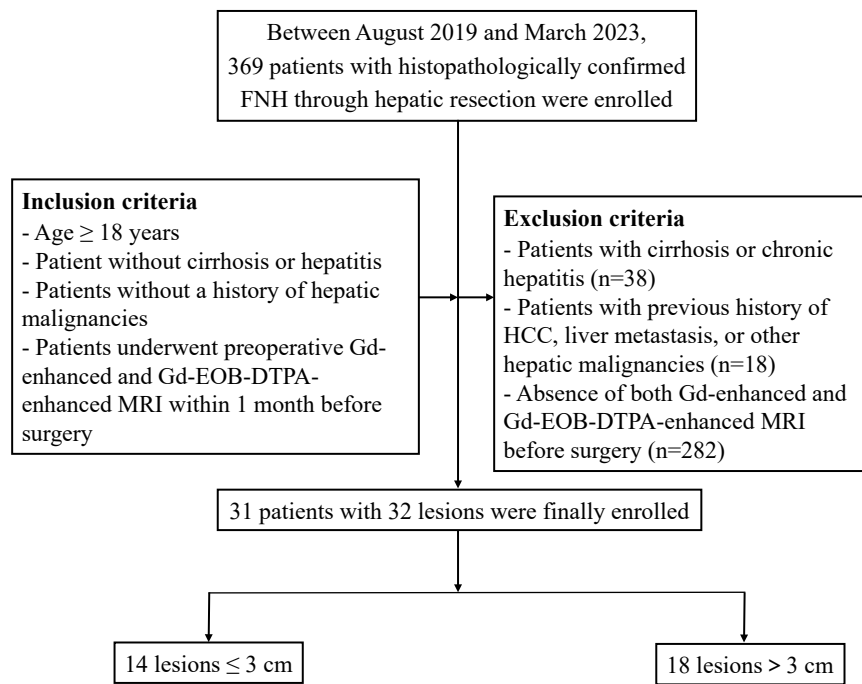

**Figure S1** Flowchart of the population who underwent Gd-EOB-DTPA-enhanced MRI. FNH, focal nodular hyperplasia; Gd-EOB-DTPA, Gadoxetic acid; MRI, magnetic resonance imaging; HCC, hepatocellular carcinoma.
